# Supplementary material for: Asymmetric and Flexible Ag-MXene/ANFs Composite Papers for Electromagnetic Shielding and Thermal Management
Source: MDPI journal article supplement (doi:10.3390/nano13182608), 2023-09-21
Supplement: s1 [file s1]

# Supporting Information

## Asymmetric and Flexible Ag-MXene/ANFs Composite Papers for Electromagnetic Shielding and Thermal Management

Xiaoai Ye<sup>a,1</sup>, Xu Zhang<sup>a,1</sup>, Xinsheng Zhou<sup>a</sup>, Guigen Wang<sup>a,b,\*</sup>

<sup>a</sup>*Guangdong Provincial Key Laboratory of Semiconductor Optoelectronic Materials and Intelligent Photonic Systems, School of Materials Science and Engineering, Harbin Institute of Technology (Shenzhen), Shenzhen 518055, P. R. China.*

<sup>b</sup>*National Key Laboratory of Science and Technology on Advanced Composites in Special Environments, Harbin Institute of Technology, Harbin 150080, P. R. China.*

\*To whom correspondence should be addressed: wangguigen@hit.edu.cn (G. G. Wang).

<sup>1</sup> These authors contributed equally to the work.

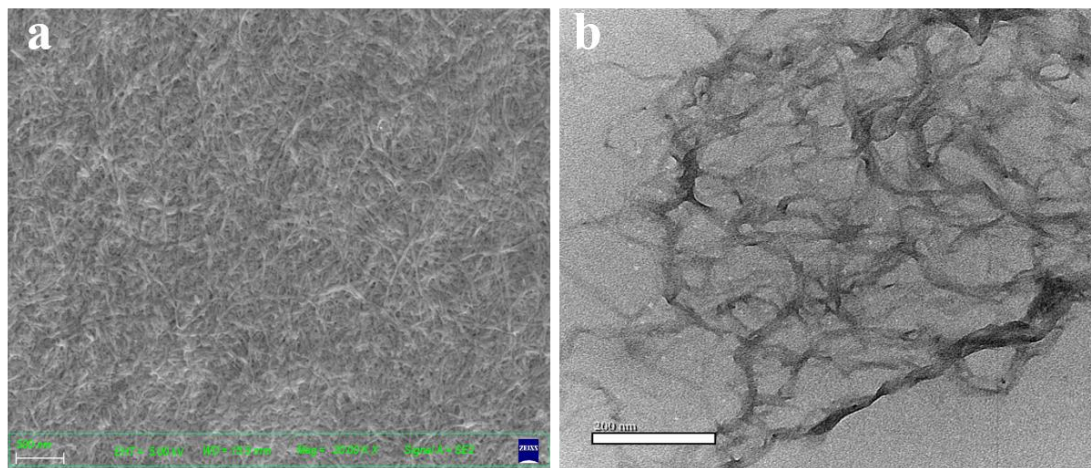

**Figure S1.** **a** SEM images of ANFs film. **b** TEM images of ANFs

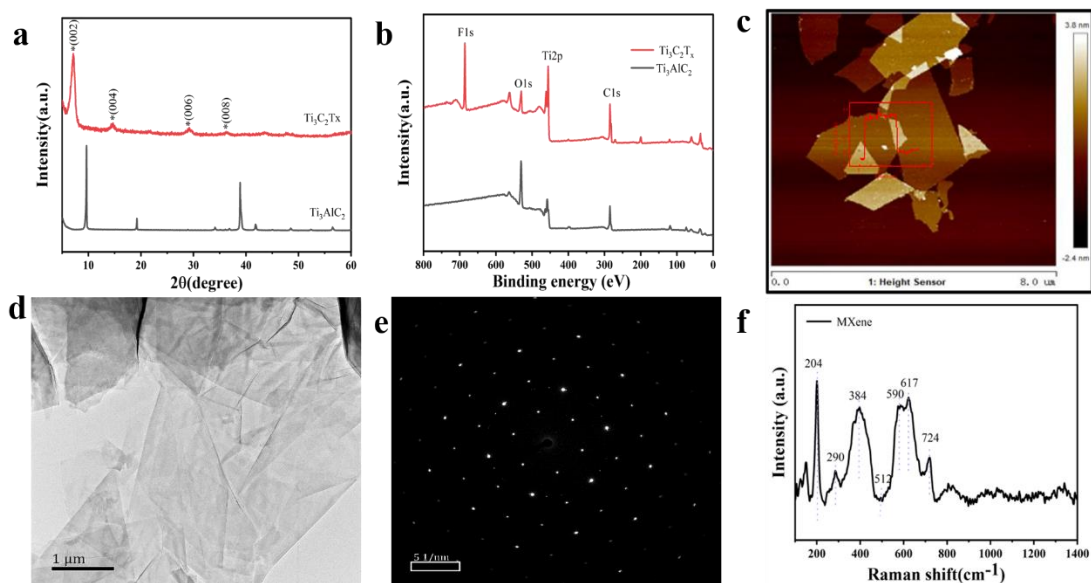

**Figure S2.** **a** XRD patterns of  $\text{Ti}_3\text{C}_2\text{T}_x$  MXene. **b** XPS wide-scan spectra of  $\text{Ti}_3\text{C}_2\text{T}_x$  MXene. **c** AFM images of  $\text{Ti}_3\text{C}_2\text{T}_x$  MXene. **d** TFM image of  $\text{Ti}_3\text{C}_2\text{T}_x$  nanosheets. **e** SAED image of  $\text{Ti}_3\text{C}_2\text{T}_x$  nanosheets. **f** Raman spectra of  $\text{Ti}_3\text{C}_2\text{T}_x$  nanosheet.

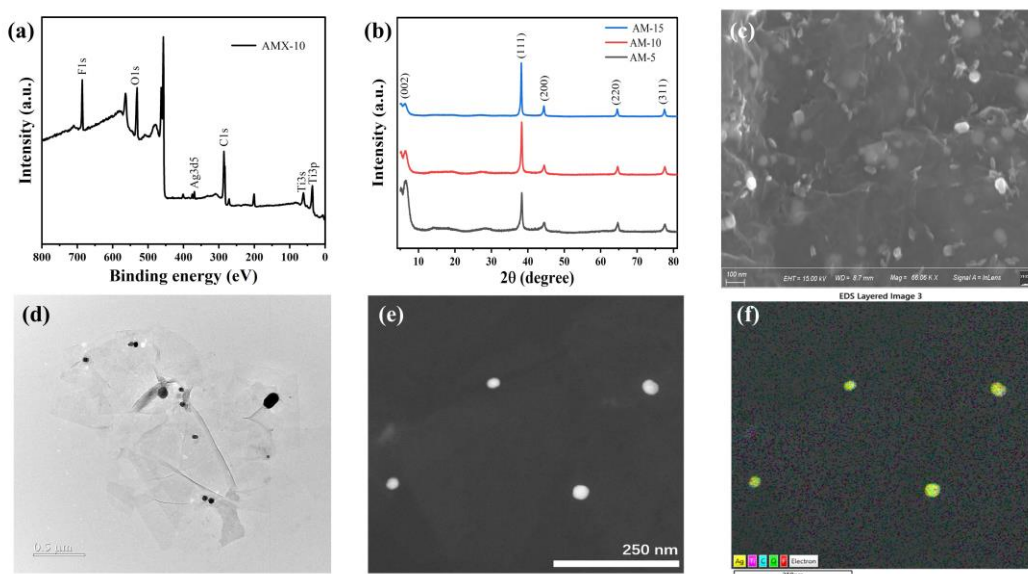

**Figure S3.** **a** Survey XPS spectra for Ag-MXene hybrids. **b** The XRD patterns of Ag-MXene hybrid nanocomposites. **c** SEM images of Ag-MXene hybrid nanocomposites. **d** TEM images of formed Ag-MXene hybrid nanocomposites. **e-f** EDS spectra of Ag-MXene Hybrids.

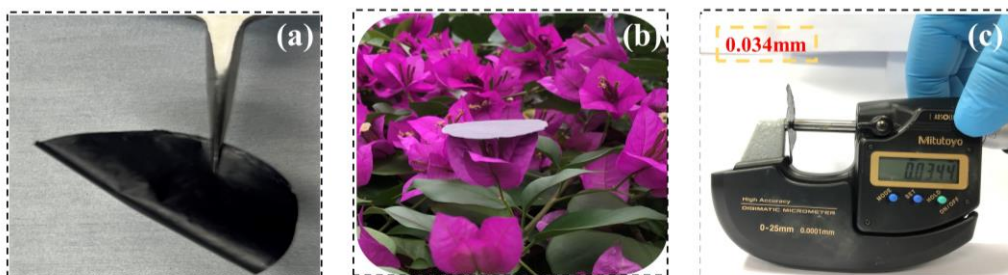

**Figure S4.** a-c Digital images of the as-obtained AMAGM composite paper.

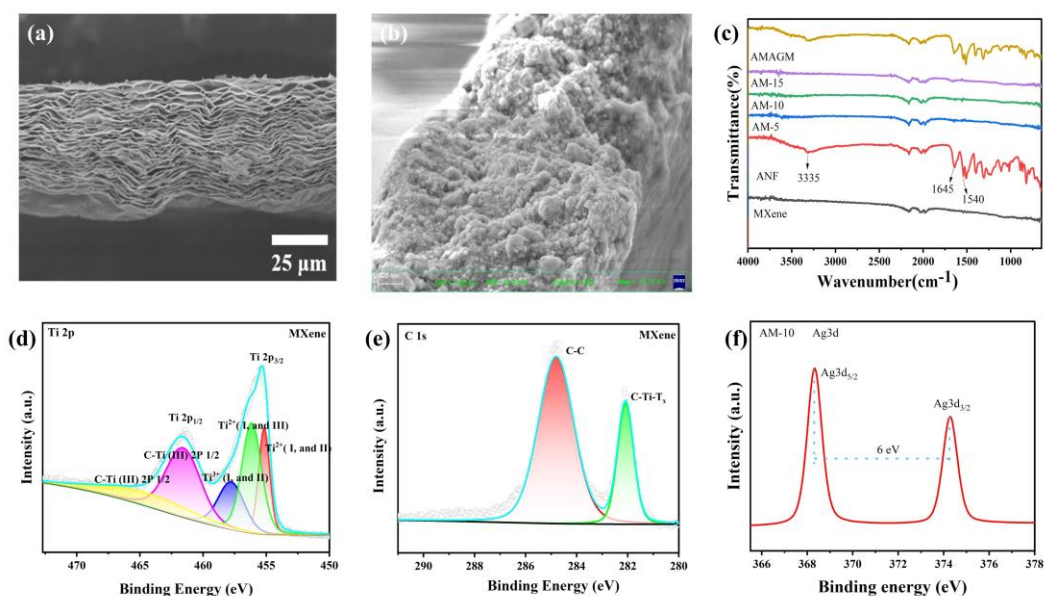

**Figure S5.** Morphology and structure characterization. **a** Cross-sectional SEM images of  $\text{Ti}_3\text{C}_2\text{T}_x$  nanosheets paper. **b** Cross-sectional SEM images of Ag-MXene composite paper. **c** FTIR spectra of MXene, ANFs and AMAGM nanocomposite papers. XPS surveys of delaminated  $\text{Ti}_3\text{C}_2\text{T}_x$  nanosheets and Ag-MXene nanocomposites. **d** High-resolution spectra of C 1s for MXene. **e** High-resolution spectra of Ti 2p for MXene. **f** High-resolution XPS spectra of Ag 3d for Ag-MXene hybrids.

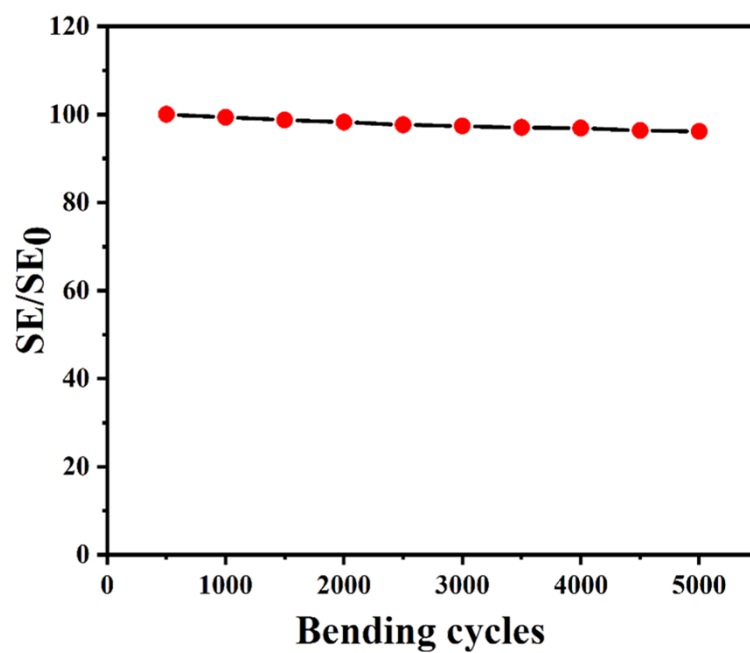

**Figure S6.** EMI SE variation of the AMAGM composite paper after 5000 cycles of bending deformation.

**Table S1.** Performance comparison of AMAGM nanocomposite papers with previous reported EMI shielding materials.

| Type        | Sample | Materials                          | Thickness<br>(mm) | SE<br>(dB) | SSE/t<br>(dB cm <sup>2</sup> g <sup>-1</sup> ) | Refs. |
|-------------|--------|------------------------------------|-------------------|------------|------------------------------------------------|-------|
| Metal-based | 1      | Ag NW                              | 0.5               | 35         | 12416                                          | [1]   |
|             | 2      | Cu foil                            | 0.01              | 70         | 7812                                           | [2]   |
|             | 3      | Ni fiber/PES                       | 2.85              | 58         | 109                                            | [3]   |
|             | 4      | Ni<br>filaments/PES                | 2.85              | 87         | 165                                            | [4]   |
|             | 5      | Cu-Ni-CNT                          | 1.5               | 54.6       | 1580                                           | [5]   |
|             | 6      | Cu-Ni foam                         | 1.5               | 25         | 690                                            | [6]   |
|             | 7      | Copper                             | 1.5               | 90         | 3200                                           | [7]   |
|             | 8      | Ag NWs/WPU<br>foam                 | 2.3               | 80         | 10907                                          | [8]   |
|             | 9      | Ag NW/epoxy                        | 0.4               | 25.09      | 5018                                           | [9]   |
|             | 10     | Cu NW@<br>graphene<br>aerogels     | 3.46              | 52.5       | 3921.8                                         | [10]  |
| rGO-based   | 11     | rGO                                | 2.5               | 45.1       | 692                                            | [11]  |
|             | 12     | rGO/PS                             | 2                 | 29         | 258                                            | [12]  |
|             | 13     | rGO/Fe <sub>3</sub> O <sub>4</sub> | 0.3               | 24         | 1033                                           | [13]  |
|             | 14     | rGO/PEDOT                          | 0.8               | 70         | 841                                            | [14]  |
| Graphene    | 15     | Graphene                           | 2                 | 75         | 4165                                           | [15]  |

|           |    |                                                       |      |      |       |      |
|-----------|----|-------------------------------------------------------|------|------|-------|------|
| ne-based  |    | foam/CNT/PD<br>MS                                     |      |      |       |      |
|           | 16 | Graphene/PD<br>MS foam                                | 1    | 30   | 5000  | [16] |
|           | 17 | Graphene/PD<br>MS                                     | 0.1  | 20   | 3330  | [17] |
|           | 18 | Microcellular<br>graphene foam                        | 0.3  | 25.2 | 14000 | [18] |
| CNT-based | 19 | MWCNT/WP<br>U                                         | 0.1  | 21.1 | 5410  | [19] |
|           | 20 | MWCNT/PC                                              | 2.1  | 39   | 164   | [20] |
|           | 21 | MWCNT/ABS                                             | 1.1  | 50   | 433   | [21] |
|           | 22 | MWCNT/PS                                              | 2    | 30   | 285   | [22] |
|           | 23 | SWCNT/PS                                              | 1.2  | 18.5 | 275   | [23] |
|           | 24 | SWCNT/epox<br>y                                       | 2    | 25   | 720   | [24] |
|           | 25 | MXCNT                                                 | 3    | 104  | 8253  | [25] |
|           | 26 | CNT sponge                                            | 2.38 | 22   | 4522  | [26] |
|           | 27 | MWCNT/PLA<br>foam                                     | 2.5  | 23   | 3080  | [27] |
|           | 28 | MWCNT/WP<br>U                                         | 0.32 | 50   | 3408  | [28] |
|           | 29 | Fe <sub>3</sub> O <sub>4</sub> @rGO/<br>MWCNT/WP<br>U | 2.3  | 23   | 4991  | [29] |

|                                     |    |                                                              |        |              |        |      |
|-------------------------------------|----|--------------------------------------------------------------|--------|--------------|--------|------|
| Carbon<br>-based                    | 30 | Carbon foam                                                  | 0.2    | 40           | 1250   | [30] |
|                                     | 31 | Carbon/PN<br>resin                                           | 0.2    | 51.2         | 1705   | [31] |
|                                     | 32 | CB/ABS                                                       | 1.1    | 20           | 1905   | [32] |
|                                     | 33 | CB/EPDM                                                      | 2      | 18           | 1500   | [33] |
|                                     | 34 | Commercial<br>carbon foam                                    | 2      | 40           | 1250   | [34] |
| MXene<br>-based                     | 35 | Ti <sub>3</sub> C <sub>2</sub> T <sub>x</sub> /CNFs          | 0.047  | 24           | 2647   | [35] |
|                                     | 36 | Ti <sub>3</sub> C <sub>2</sub> T <sub>x</sub> /rGO/e<br>poxy | 2      | 56.4         | 9400   | [36] |
|                                     | 37 | CNF@MXene                                                    | 0.035  | 39.670<br>29 | 6800   | [37] |
| Conduc<br>tive<br>Polyme<br>r-based | 38 | PPy/ANFs                                                     | 0.076  | 41.69        | 2762.5 | [38] |
| This<br>work                        | 39 | AMA mixture                                                  | 0.0344 | 37.5         | 6319   |      |
|                                     | 40 | AMAGM                                                        | 0.0344 | 62           | 11923  |      |

## Supplementary References

[1] Ma J, Wang K, Zhan M. A comparative study of structure and electromagnetic

interference shielding performance for silver nanostructure hybrid polyimide foams. *RSC Advances*. 2015;5(80):65283-96.

[2] Shahzad F, Alhabeb M, Hatter CB, Anasori B, Man Hong S, Koo CM, et al. Electromagnetic interference shielding with 2D transition metal carbides (MXenes). *Science*. 2016;353(6304):1137-40.

[3] Shui X, Chung DDL. Nickel filament polymer-matrix composites with low surface impedance and high electromagnetic interference shielding effectiveness. *J Electron Mater*. 1997;26(8):928-34.

[4] Song W-L, Guan X-T, Fan L-Z, Cao W-Q, Wang C-Y, Zhao Q-L, et al. Magnetic and conductive graphene papers toward thin layers of effective electromagnetic shielding. *Journal of Materials Chemistry A*. 2015;3(5):2097-107.

[5] Ji K, Zhao H, Zhang J, Chen J, Dai Z. Fabrication and electromagnetic interference shielding performance of open-cell foam of a Cu–Ni alloy integrated with CNTs. *Appl Surf Sci*. 2014;311:351-6.

[6] Ji K, Zhao H, Huang Z, Dai Z. Performance of open-cell foam of Cu–Ni alloy integrated with graphene as a shield against electromagnetic interference. *Materials Letters*. 2014;122:244-7.

[7] Kamal Halder K, Sonker RK, Sachdev VK, Tomar M, Gupta V. Study of electrical, dielectric and EMI shielding behavior of copper metal, copper ferrite and PVDF composite. *Integrated Ferroelectrics*. 2018;194(1):80-7.

[8] Zeng Z, Chen M, Pei Y, Seyed Shahabadi SI, Che B, Wang P, et al. Ultralight and Flexible Polyurethane/Silver Nanowire Nanocomposites with Unidirectional Pores for Highly Effective Electromagnetic Shielding. *ACS Applied Materials & Interfaces*. 2017;9(37):32211-9.

[9] Yu Y-H, Ma C-CM, Teng C-C, Huang Y-L, Lee S-H, Wang I, et al. Electrical, morphological, and electromagnetic interference shielding properties of silver nanowires and nanoparticles conductive composites. *Materials Chemistry and Physics*. 2012;136(2):334-40.

[10] Wu S, Zou M, Li Z, Chen D, Zhang H, Yuan Y, et al. Robust and Stable Cu Nanowire@Graphene Core–Shell Aerogels for Ultraeffective Electromagnetic



Interference Shielding. *Small*. 2018;14(23):1800634.

[11] Yan D-X, Pang H, Li B, Vajtai R, Xu L, Ren P-G, et al. Structured Reduced Graphene Oxide/Polymer Composites for Ultra-Efficient Electromagnetic Interference Shielding. *Advanced Functional Materials*. 2015;25(4):559-66.

[12] Yan D-X, Ren P-G, Pang H, Fu Q, Yang M-B, Li Z-M. Efficient electromagnetic interference shielding of lightweight graphene/polystyrene composite. *Journal of Materials Chemistry*. 2012;22(36):18772-4.

[13] Xu Y, Wang Q, Cao Y, Wei X, Huang B. Preparation of a reduced graphene oxide/SiO<sub>2</sub>/Fe<sub>3</sub>O<sub>4</sub> UV-curing material and its excellent microwave absorption properties. *RSC Advances*. 2017;7(29):18172-7.

[14] Agnihotri N, Chakrabarti K, De A. Highly efficient electromagnetic interference shielding using graphite nanoplatelet/poly(3,4-ethylenedioxythiophene)–poly(styrenesulfonate) composites with enhanced thermal conductivity. *RSC Advances*. 2015;5(54):43765-71.

[15] Kong L, Yin X, Yuan X, Zhang Y, Liu X, Cheng L, et al. Electromagnetic wave absorption properties of graphene modified with carbon nanotube/poly(dimethyl siloxane) composites. *Carbon*. 2014;73:185-93.

[16] Chen Z, Xu C, Ma C, Ren W, Cheng H-M. Lightweight and Flexible Graphene Foam Composites for High-Performance Electromagnetic Interference Shielding. *Advanced Materials*. 2013;25(9):1296-300.

[17] Xia X, Wang Y, Zhong Z, Weng GJ. A theory of electrical conductivity, dielectric constant, and electromagnetic interference shielding for lightweight graphene composite foams. *Journal of Applied Physics*. 2016;120(8).

[18] Shen B, Li Y, Yi D, Zhai W, Wei X, Zheng W. Microcellular graphene foam for improved broadband electromagnetic interference shielding. *Carbon*. 2016;102:154-60.

[19] Zeng Z, Jin H, Chen M, Li W, Zhou L, Zhang Z. Lightweight and Anisotropic Porous MWCNT/WPU Composites for Ultrahigh Performance Electromagnetic Interference Shielding. *Advanced Functional Materials*. 2016;26(2):303-10.

[20] Pande S, Chaudhary A, Patel D, Singh BP, Mathur RB. Mechanical and electrical properties of multiwall carbon nanotube/polycarbonate composites for electrostatic

discharge and electromagnetic interference shielding applications. RSC Advances. 2014;4(27):13839-49.

[21] Al-Saleh MH, Saadeh WH, Sundararaj U. EMI shielding effectiveness of carbon based nanostructured polymeric materials: A comparative study. Carbon. 2013;60:146-56.

[22] Arjmand M, Apperley T, Okoniewski M, Sundararaj U. Comparative study of electromagnetic interference shielding properties of injection molded versus compression molded multi-walled carbon nanotube/polystyrene composites. Carbon. 2012;50(14):5126-34.

[23] Yang Y, Gupta MC, Dudley KL, Lawrence RW. Novel Carbon Nanotube – Polystyrene Foam Composites for Electromagnetic Interference Shielding. Nano Letters. 2005;5(11):2131-4.

[24] Huang Y, Li N, Ma Y, Du F, Li F, He X, et al. The influence of single-walled carbon nanotube structure on the electromagnetic interference shielding efficiency of its epoxy composites. Carbon. 2007;45(8):1614-21.

[25] Sambyal P, Iqbal A, Hong J, Kim H, Kim M-K, Hong SM, et al. Ultralight and Mechanically Robust  $\text{Ti}_3\text{C}_2\text{T}_x$  Hybrid Aerogel Reinforced by Carbon Nanotubes for Electromagnetic Interference Shielding. ACS Applied Materials & Interfaces. 2019;11(41):38046-54.

[26] Crespo M, González M, Elías AL, Pulickal Rajukumar L, Baselga J, Terrones M, et al. Ultra-light carbon nanotube sponge as an efficient electromagnetic shielding material in the GHz range. physica status solidi (RRL) – Rapid Research Letters. 2014;8(8):698-704.

[27] Kuang T, Chang L, Chen F, Sheng Y, Fu D, Peng X. Facile preparation of lightweight high-strength biodegradable polymer/multi-walled carbon nanotubes nanocomposite foams for electromagnetic interference shielding. Carbon. 2016;105:305-13.

[28] Zeng Z, Chen M, Jin H, Li W, Xue X, Zhou L, et al. Thin and flexible multi-walled carbon nanotube/waterborne polyurethane composites with high-performance

electromagnetic interference shielding. *Carbon*. 2016;96:768-77.

[29] Sheng A, Ren W, Yang Y, Yan D-X, Duan H, Zhao G, et al. Multilayer WPU conductive composites with controllable electro-magnetic gradient for absorption-dominated electromagnetic interference shielding. *Composites Part A: Applied Science and Manufacturing*. 2020;129:105692.

[30] Moglie F, Micheli D, Laurenzi S, Marchetti M, Mariani Primiani V. Electromagnetic shielding performance of carbon foams. *Carbon*. 2012;50(5):1972-80.

[31] Zhang L, Liu M, Roy S, Chu EK, See KY, Hu X. Phthalonitrile-Based Carbon Foam with High Specific Mechanical Strength and Superior Electromagnetic Interference Shielding Performance. *ACS applied materials & interfaces*. 2016;8 11:7422-30.

[32] Moulart A, Marrett C, Colton J. Polymeric composites for use in electronic and microwave devices. *Polymer Engineering & Science*. 2004;44(3):588-97.

[33] Ghosh P, Chakrabarti A. Conducting carbon black filled EPDM vulcanizates: assessment of dependence of physical and mechanical properties and conducting character on variation of filler loading. *European Polymer Journal*. 2000;36(5):1043-54.

[34] Bera R, Maiti S, Khatua BB. High electromagnetic interference shielding with high electrical conductivity through selective dispersion of multiwall carbon nanotube in poly ( $\epsilon$ -caprolactone)/MWCNT composites. *Journal of Applied Polymer Science*. 2015;132(26).

[35] Cao W-T, Chen F-F, Zhu Y-J, Zhang Y-G, Jiang Y-Y, Ma M-G, et al. Binary Strengthening and Toughening of MXene/Cellulose Nanofiber Composite Paper with Nacre-Inspired Structure and Superior Electromagnetic Interference Shielding Properties. *ACS Nano*. 2018;12(5):4583-93.

[36] Zhao S, Zhang H-B, Luo J-Q, Wang Q-W, Xu B, Hong S, et al. Highly Electrically Conductive Three-Dimensional Ti<sub>3</sub>C<sub>2</sub>T<sub>x</sub> MXene/Reduced Graphene Oxide Hybrid Aerogels with Excellent Electromagnetic Interference Shielding Performances. *ACS Nano*. 2018;12(11):11193-202.

[37] Zhou B, Zhang Z, Li Y, Han G, Feng Y, Wang B, et al. Flexible, Robust, and

Multifunctional Electromagnetic Interference Shielding Film with Alternating Cellulose Nanofiber and MXene Layers. *ACS Applied Materials & Interfaces*. 2020;12(4):4895-905.

[38] Zhou J, Thaiboonrod S, Fang J, Cao S, Miao M, Feng X. In-situ growth of polypyrrole on aramid nanofibers for electromagnetic interference shielding films with high stability. *Nano Research*. 2022;15(9):8536-45.
